# Supplementary material for: Exploring and exploiting the genetic variation of Fusarium head blight resistance for genomic-assisted breeding in the elite durum wheat gene pool
Source: PubMed Central journal article supplement (PMC6449325; doi:10.1007/s00122-018-3253-9), 2018-12-01
Supplement: 122_2018_3253_MOESM3_ESM.pdf [file 122_2018_3253_MOESM3_ESM.pdf]

**Figure S3**

**Article Title:** Exploring and exploiting the genetic variation of Fusarium head blight resistance for genomic-assisted breeding in the elite durum wheat gene pool

**Journal:** Theoretical and Applied Genetics

**Authors:** Barbara Steiner, Sebastian Michel, Marco Maccaferri, Marc Lemmens, Roberto Tuberosa, Hermann Buerstmayr

**Name, affiliation, and email of corresponding author:**

Sebastian Michel  
Department for Agrobiotechnology (IFA-Tulln)  
Institute for Biotechnology in Plant Production  
University of Natural Resources and Life Sciences, Vienna (BOKU)  
Konrad-Lorenz-Str. 20, 3430 Tulln, Austria  
e-mail: sebastian.michel@boku.ac.at

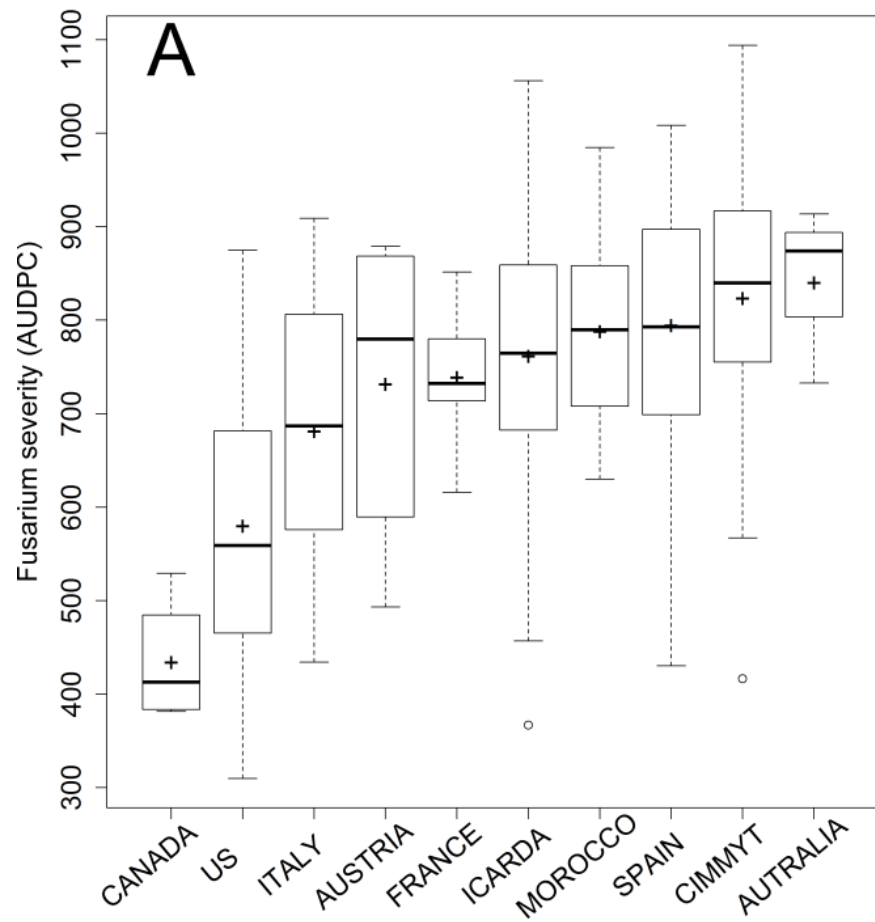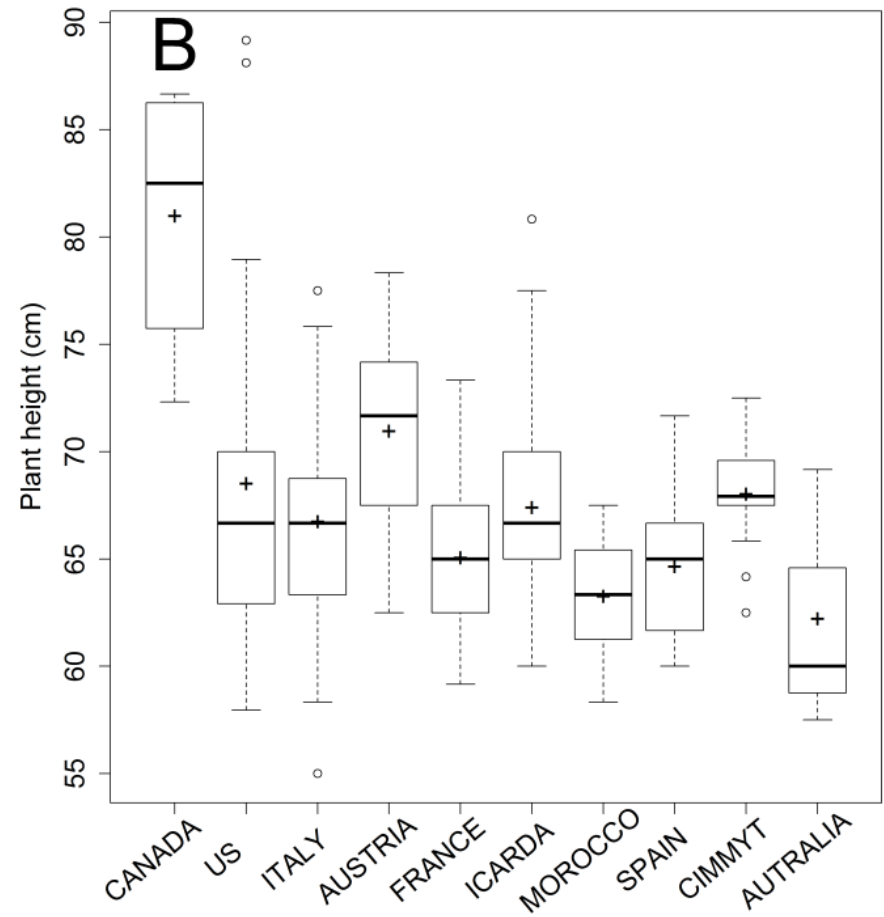

**Fig. S3** Distribution for FHB severity (A) and plant height (B) with respect to the line origins.
